# Supplementary material
Source: PubMed Central journal article supplement (PMC2515080)
Supplement: jc.2008-0397_1.pdf [file jc.2008-0397_1.pdf]

## Supplementary information

Supplementary Table 1a – Free T4 by genotype of 16 SNPs across three *DIO* genes in WATTs

| SNP               | common homozygous        |            | heterozygous             |            | minor homozygous         |            | p for trend  |                  |
|-------------------|--------------------------|------------|--------------------------|------------|--------------------------|------------|--------------|------------------|
|                   | mean fT4 (95%CI)         | n          | mean fT4 (95%CI)         | n          | mean fT4 (95%CI)         | n          | unadj        | adj <sup>a</sup> |
| <i>DIO1</i>       |                          |            |                          |            |                          |            |              |                  |
| rs11206237        | 21.0 (20.6, 21.3)        | 399        | 21.2 (20.5, 21.9)        | 130        | 21.5 (19.9, 23.1)        | 16         | 0.43         | 0.34             |
| <b>rs11206244</b> | <b>20.8 (20.3, 21.3)</b> | <b>239</b> | <b>21.2 (20.7, 21.7)</b> | <b>238</b> | <b>21.6 (20.7, 22.5)</b> | <b>69</b>  | <b>0.09</b>  | <b>0.08</b>      |
| <b>rs2235544</b>  | <b>21.7 (21.1, 22.3)</b> | <b>143</b> | <b>21.1 (20.6, 21.5)</b> | <b>288</b> | <b>20.4 (19.7, 21.0)</b> | <b>111</b> | <b>0.005</b> | <b>0.007</b>     |
| rs2268181         | 21.1 (20.7, 21.4)        | 387        | 21.0 (20.4, 21.7)        | 140        | 21.7 (20.3, 23.0)        | 19         | 0.69         | 0.57             |
| rs2294511         | 21.0 (20.5, 21.5)        | 240        | 21.3 (20.8, 21.8)        | 248        | 20.8 (19.9, 21.6)        | 56         | 0.88         | 0.89             |
| rs2294512         | 21.1 (20.7, 21.6)        | 252        | 21.2 (20.7, 21.6)        | 245        | 20.4 (19.2, 21.6)        | 50         | 0.41         | 0.30             |
| rs4926616         | 21.2 (20.7, 21.7)        | 245        | 20.9 (20.5, 21.4)        | 236        | 21.0 (20.1, 22.0)        | 56         | 0.56         | 0.55             |
| rs731828          | 20.9 (20.3, 21.4)        | 183        | 21.2 (20.8, 21.6)        | 278        | 21.1 (20.3, 21.8)        | 84         | 0.50         | 0.61             |
| rs7527713         | 21.0 (20.7, 21.4)        | 362        | 21.1 (20.4, 21.7)        | 157        | 21.0 (20.7, 21.4)        | 26         | 0.55         | 0.43             |
| <i>DIO2</i>       |                          |            |                          |            |                          |            |              |                  |
| rs225011          | 21.2 (20.6, 21.7)        | 172        | 21.2 (20.7, 21.6)        | 264        | 20.7 (20.0, 21.4)        | 107        | 0.32         | 0.33             |
| rs225014          | 21.3 (20.8, 21.8)        | 223        | 21.0 (20.5, 21.4)        | 236        | 20.7 (19.9, 21.4)        | 87         | 0.12         | 0.13             |
| rs225015          | 21.2 (20.7, 21.7)        | 237        | 21.1 (20.6, 21.5)        | 236        | 20.6 (19.7, 21.5)        | 71         | 0.30         | 0.31             |
| <i>DIO3</i>       |                          |            |                          |            |                          |            |              |                  |
| rs17716499        | 20.9 (20.4, 21.4)        | 202        | 21.2 (20.8, 21.7)        | 248        | 20.9 (20.1, 21.8)        | 95         | 0.80         | 0.84             |
| rs7150269         | 20.7 (20.1, 21.2)        | 169        | 21.5 (21.0, 21.9)        | 254        | 20.8 (20.1, 21.4)        | 121        | 0.64         | 0.65             |
| rs8011440         | 20.8 (20.3, 21.3)        | 215        | 21.4 (20.9, 21.9)        | 246        | 20.8 (20.0, 21.6)        | 85         | 0.65         | 0.60             |
| rs945006          | 21.0 (20.7, 21.4)        | 438        | 21.4 (20.7, 22.1)        | 92         | 20.4 (16.8, 24.1)        | 10         | 0.58         | 0.64             |

<sup>a</sup> – adjusted for age and sex

**Supplementary Table 1b- Free T3 by genotype in WATTS cohort**

| SNP               | common homozygous        |            | heterozygous             |            | minor homozygous         |            | p for trend |                  |
|-------------------|--------------------------|------------|--------------------------|------------|--------------------------|------------|-------------|------------------|
|                   | mean fT3 (95%CI)         | n          | mean fT3 (95%CI)         | n          | mean fT3 (95%CI)         | n          | unadj       | adj <sup>a</sup> |
| <i>DIO1</i>       |                          |            |                          |            |                          |            |             |                  |
| rs11206237        | 3.83 (3.76, 3.90)        | 399        | 3.86 (3.75, 3.97)        | 130        | 4.11 (3.73, 4.49)        | 16         | 0.22        | 0.32             |
| <b>rs11206244</b> | <b>3.91 (3.81, 4.00)</b> | <b>239</b> | <b>3.84 (3.75, 3.93)</b> | <b>238</b> | <b>3.69 (3.53, 3.85)</b> | <b>69</b>  | <b>0.03</b> | <b>0.02</b>      |
| <b>rs2235544</b>  | <b>3.75 (3.65, 3.86)</b> | <b>143</b> | <b>3.88 (3.80, 3.96)</b> | <b>288</b> | <b>3.91 (3.76, 4.07)</b> | <b>111</b> | <b>0.06</b> | <b>0.09</b>      |
| rs2268181         | 3.84 (3.76, 3.91)        | 387        | 3.86 (3.75, 3.96)        | 140        | 4.13 (3.80, 4.45)        | 19         | 0.23        | 0.37             |
| rs2294511         | 3.93 (3.84, 4.02)        | 240        | 3.81 (3.72, 3.90)        | 248        | 3.72 (3.53, 3.91)        | 56         | 0.02        | 0.02             |
| rs2294512         | 3.83 (3.74, 3.92)        | 252        | 3.82 (3.74, 3.91)        | 245        | 4.08 (3.83, 4.33)        | 50         | 0.13        | 0.05             |
| rs4926616         | 3.90 (3.81, 3.99)        | 245        | 3.82 (3.72, 3.92)        | 236        | 3.82 (3.63, 4.00)        | 56         | 0.24        | 0.25             |
| rs731828          | 3.78 (3.67, 3.88)        | 183        | 3.89 (3.80, 3.97)        | 278        | 3.91 (3.74, 4.07)        | 84         | 0.10        | 0.05             |
| rs7527713         | 3.84 (3.76, 3.92)        | 362        | 3.86 (3.77, 3.96)        | 157        | 3.94 (3.66, 4.22)        | 26         | 0.50        | 0.75             |
| <i>DIO2</i>       |                          |            |                          |            |                          |            |             |                  |
| rs225011          | 3.80 (3.69, 3.90)        | 172        | 3.89 (3.80, 3.98)        | 264        | 3.83 (3.70, 3.96)        | 107        | 0.54        | 0.58             |
| rs225014          | 3.86 (3.76, 3.97)        | 223        | 3.82 (3.74, 3.91)        | 236        | 3.89 (3.75, 4.04)        | 87         | 0.98        | 0.95             |
| rs225015          | 3.85 (3.75, 3.95)        | 237        | 3.85 (3.76, 3.94)        | 236        | 3.87 (3.71, 4.02)        | 71         | 0.93        | 0.99             |
| <i>DIO3</i>       |                          |            |                          |            |                          |            |             |                  |
| rs17716499        | 3.90 (3.80, 4.00)        | 202        | 3.79 (3.70, 3.88)        | 248        | 3.91 (3.76, 4.05)        | 95         | 0.69        | 0.76             |
| rs7150269         | 3.85 (3.75, 3.95)        | 169        | 3.89 (3.80, 3.99)        | 254        | 3.77 (3.65, 3.90)        | 121        | 0.47        | 0.49             |
| rs8011440         | 3.85 (3.76, 3.95)        | 215        | 3.87 (3.78, 3.96)        | 246        | 3.79 (3.65, 3.94)        | 85         | 0.64        | 0.53             |
| rs945006          | 3.83 (3.76, 3.90)        | 438        | 3.94 (3.77, 4.10)        | 92         | 3.85 (3.38, 4.32)        | 10         | 0.28        | 0.20             |

<sup>a</sup> – adjusted for age and sex

**Supplementary Table 1c - serum TSH by genotype in WATTS cohort**

| SNP         | common homozygous |     | heterozygous      |     | minor homozygous  |     | p for trend |                  |
|-------------|-------------------|-----|-------------------|-----|-------------------|-----|-------------|------------------|
|             | mean TSH (95% CI) | n   | mean TSH (95% CI) | n   | mean TSH (95% CI) | n   | unadj       | adj <sup>a</sup> |
| <i>DIO1</i> |                   |     |                   |     |                   |     |             |                  |
| rs11206237  | 0.71 (0.61, 0.82) | 399 | 0.64 (0.50, 0.81) | 130 | 0.65 (0.31, 1.36) | 16  | 0.50        | 0.40             |
| rs11206244  | 0.67 (0.55, 0.81) | 239 | 0.68 (0.56, 0.82) | 238 | 0.76 (0.55, 1.06) | 69  | 0.59        | 0.60             |
| rs2235544   | 0.67 (0.53, 0.85) | 143 | 0.65 (0.55, 0.78) | 288 | 0.79 (0.61, 1.03) | 111 | 0.42        | 0.45             |
| rs2268181   | 0.71 (0.61, 0.82) | 387 | 0.64 (0.51, 0.82) | 140 | 0.54 (0.29, 1.04) | 19  | 0.35        | 0.27             |
| rs2294511   | 0.67 (0.56, 0.81) | 240 | 0.62 (0.52, 0.76) | 248 | 1.02 (0.72, 1.45) | 56  | 0.27        | 0.29             |
| rs2294512   | 0.68 (0.57, 0.81) | 252 | 0.67 (0.55, 0.81) | 245 | 0.74 (0.47, 1.15) | 50  | 0.85        | 0.79             |
| rs4926616   | 0.60 (0.50, 0.73) | 245 | 0.70 (0.58, 0.85) | 236 | 1.03 (0.70, 1.50) | 56  | 0.02        | 0.02             |
| rs731828    | 0.80 (0.64, 0.99) | 183 | 0.63 (0.53, 0.75) | 278 | 0.63 (0.45, 0.89) | 84  | 0.14        | 0.23             |
| rs7527713   | 0.70 (0.59, 0.81) | 362 | 0.66 (0.53, 0.82) | 157 | 0.67 (0.39, 1.15) | 26  | 0.75        | 0.62             |
| <i>DIO2</i> |                   |     |                   |     |                   |     |             |                  |
| rs225011    | 0.71 (0.58, 0.89) | 172 | 0.65 (0.54, 0.78) | 264 | 0.73 (0.54, 0.98) | 107 | 0.99        | 0.83             |
| rs225014    | 0.64 (0.53, 0.77) | 223 | 0.73 (0.60, 0.89) | 236 | 0.69 (0.49, 0.97) | 87  | 0.47        | 0.38             |
| rs225015    | 0.67 (0.56, 0.80) | 237 | 0.68 (0.56, 0.88) | 236 | 0.75 (0.51, 1.10) | 71  | 0.62        | 0.52             |
| <i>DIO3</i> |                   |     |                   |     |                   |     |             |                  |
| rs17716499  | 0.67 (0.55, 0.83) | 202 | 0.65 (0.54, 0.78) | 248 | 0.80 (0.58, 1.10) | 95  | 0.46        | 0.38             |
| rs7150269   | 0.75 (0.60, 0.94) | 169 | 0.56 (0.47, 0.68) | 254 | 0.89 (0.68, 1.16) | 121 | 0.55        | 0.54             |
| rs8011440   | 0.74 (0.61, 0.90) | 215 | 0.58 (0.48, 0.70) | 246 | 0.90 (0.66, 1.22) | 85  | 0.82        | 0.78             |
| rs945006    | 0.67 (0.58, 0.77) | 438 | 0.77 (0.57, 1.03) | 92  | 1.03 (0.40, 2.65) | 10  | 0.24        | 0.24             |

<sup>a</sup> – adjusted for age and sex

**Supplementary Table 1d - Reverse T3 by genotype in WATTS cohort**

| SNP              | common homozygous        |            | heterozygous             |            | minor homozygous         |            | p for trend  |                  |
|------------------|--------------------------|------------|--------------------------|------------|--------------------------|------------|--------------|------------------|
|                  | mean rT3 (95% CI)        | n          | mean rT3 (95% CI)        | n          | mean rT3 (95% CI)        | n          | unadj        | adj <sup>a</sup> |
| rs11206237       | 0.40 (0.39, 0.42)        | 399        | 0.39 (0.37, 0.42)        | 130        | 0.38 (0.33, 0.43)        | 16         | 0.24         | 0.25             |
| rs11206244       | 0.39 (0.38, 0.41)        | 239        | 0.40 (0.39, 0.42)        | 238        | 0.42 (0.38, 0.45)        | 69         | 0.23         | 0.23             |
| <b>rs2235544</b> | <b>0.43 (0.41, 0.46)</b> | <b>143</b> | <b>0.39 (0.38, 0.41)</b> | <b>288</b> | <b>0.39 (0.36, 0.41)</b> | <b>111</b> | <b>0.004</b> | <b>0.004</b>     |
| rs2268181        | 0.41 (0.39, 0.42)        | 387        | 0.39 (0.36, 0.41)        | 140        | 0.38 (0.34, 0.43)        | 19         | 0.11         | 0.12             |
| rs2294511        | 0.39 (0.38, 0.41)        | 240        | 0.41 (0.39, 0.43)        | 248        | 0.39 (0.36, 0.42)        | 56         | 0.46         | 0.50             |
| rs2294512        | 0.40 (0.38, 0.42)        | 252        | 0.40 (0.39, 0.42)        | 245        | 0.40 (0.36, 0.44)        | 50         | 0.88         | 0.96             |
| rs4926616        | 0.39 (0.38, 0.41)        | 245        | 0.41 (0.39, 0.43)        | 236        | 0.40 (0.37, 0.44)        | 56         | 0.31         | 0.32             |
| rs731828         | 0.39 (0.37, 0.41)        | 183        | 0.41 (0.40, 0.43)        | 278        | 0.40 (0.37, 0.43)        | 84         | 0.24         | 0.19             |
| rs7527713        | 0.40 (0.39, 0.42)        | 362        | 0.40 (0.38, 0.42)        | 157        | 0.38 (0.34, 0.43)        | 26         | 0.40         | 0.43             |
| D2               |                          |            |                          |            |                          |            |              |                  |
| rs225011         | 0.41 (0.39, 0.43)        | 172        | 0.40 (0.38, 0.42)        | 264        | 0.39 (0.36, 0.41)        | 107        | 0.18         | 0.25             |
| rs225014         | 0.41 (0.39, 0.43)        | 223        | 0.39 (0.38, 0.41)        | 236        | 0.40 (0.37, 0.42)        | 87         | 0.21         | 0.27             |
| rs225015         | 0.41 (0.39, 0.43)        | 237        | 0.40 (0.38, 0.41)        | 236        | 0.39 (0.36, 0.42)        | 71         | 0.29         | 0.34             |
| D3               |                          |            |                          |            |                          |            |              |                  |
| rs17716499       | 0.39 (0.37, 0.41)        | 202        | 0.41 (0.40, 0.43)        | 248        | 0.39 (0.36, 0.42)        | 95         | 0.74         | 0.72             |
| rs7150269        | 0.38 (0.36, 0.40)        | 169        | 0.41 (0.40, 0.43)        | 254        | 0.40 (0.37, 0.42)        | 121        | 0.34         | 0.36             |
| rs8011440        | 0.40 (0.38, 0.42)        | 215        | 0.40 (0.39, 0.42)        | 246        | 0.39 (0.36, 0.42)        | 85         | 0.84         | 0.89             |
| rs945006         | 0.40 (0.38, 0.41)        | 438        | 0.43 (0.40, 0.45)        | 92         | 0.39 (0.25, 0.53)        | 10         | 0.12         | 0.12             |

<sup>a</sup> – adjusted for age and sex
