# Supplementary material
Source: PubMed Central journal article supplement (PMC2515080)
Supplement: jc.2008-0397_2.pdf [file jc.2008-0397_2.pdf]

**Supplementary Table 2 – Association of two *DIO1* SNPs reaching nominal associations in WATs with ft3/ft4 ratio and TSH levels in EFSOCH**

| SNP        | Sex      | Free T3:Free T4 |                  |                      | TSH    |               |       |
|------------|----------|-----------------|------------------|----------------------|--------|---------------|-------|
|            |          | Beta            | 95% CI           | p                    | Beta   | 95% CI        | p     |
| rs2235544  | Male     | 0.009           | (0.008, 0.017)   | 1.3x10 <sup>-6</sup> | -0.001 | (-0.02, 0.02) | 0.938 |
|            | Pregnant | 0.003           | (-0.001, 0.008)  | 0.094                | 0.010  | (-0.01, 0.03) | 0.357 |
|            | Female   |                 |                  |                      |        |               |       |
| rs11206244 | Male     | -0.006          | (-0.100, -0.002) | 0.005                | -0.013 | (-0.04, 0.01) | 0.258 |
|            | Pregnant | 0.00002         | (-0.008, 0.008)  | 0.995                | 0.007  | (-0.02, 0.03) | 0.571 |
|            | Female   |                 |                  |                      |        |               |       |
